# Supplementary material for: Deficiency of ROS‐Activated TRPM2 Channel Protects Neurons from Cerebral Ischemia‐Reperfusion Injury through Upregulating Autophagy
Source: Hindawi journal article supplement (doi:10.1155/2021/7356266), 2021-01-01
Supplement: f1 [file 7356266.f1.pdf]

## Supplementary Materials

### **Oxidative Medicine and Cellular Longevity** Special Issue on **Reactive Oxygen Species in inflammation and Tissue Injury**

#### **Deficiency of ROS-activated TRPM2 ion channel protects neurons from cerebral ischemia-reperfusion injury through up-regulating autophagy**

Xupang Hu<sup>1,#</sup>, Lijuan Wu<sup>1,2,#</sup>, Xingyu Liu<sup>1</sup>, Yi Zhang<sup>1</sup>, Min Xu<sup>1</sup>, Qiuyuan Fang<sup>1</sup>, Lin Lu<sup>3</sup>, Tarek Mohamed Abd El-Aziz<sup>4,5</sup>, Fangfang Li<sup>1,\*</sup>, Wei Yang<sup>1,\*</sup>

<sup>1</sup>Department of Biophysics, and Department of Neurosurgery of the First Affiliated Hospital, Zhejiang University School of Medicine, Hangzhou 310058, China;

<sup>2</sup>School of Medicine, Taizhou University, Taizhou, China

<sup>3</sup>School of Medicine, Zhejiang University City College, Hangzhou 310015, China;

<sup>4</sup>Department of Cellular and Integrative Physiology, University of Texas Health Science Center at San Antonio, San Antonio, TX 78229-3900, USA;

<sup>5</sup>Zoology Department, Faculty of Science, Minia University, El-Minia 61519, Egypt

These authors contributed equally to this work.

Correspondence should be addressed to: Wei Yang; yangwei@zju.edu.cn

Fangfang Li; 0618314@zju.edu.cn

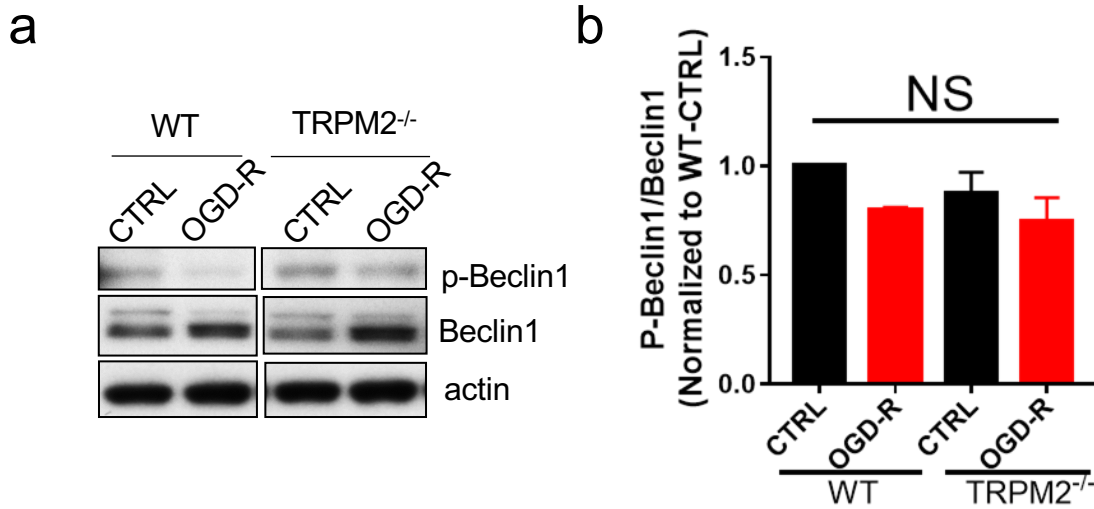

**Figure S1.** TRPM2 deficiency-upregulated autophagy is Beclin1-independent. (a) Primary cultured neurons subjected to medium alone (CTRL), 1 h of OGD plus 3 h of reperfusion (OGD-R) at DIV9. 3  $\mu$ g of protein was sequentially immunoblotted with antibodies against Beclin1, phos-S295-Beclin1 and  $\beta$ -actin. (b) Normalized ratio of the phos-S295-Beclin1 and Beclin1 band intensities, determined from three independent experiments performed as in (a). \*\*\*\*  $p < 0.0001$ ; NS, not significant; One-way ANOVA with *post-hoc* Tukey test.

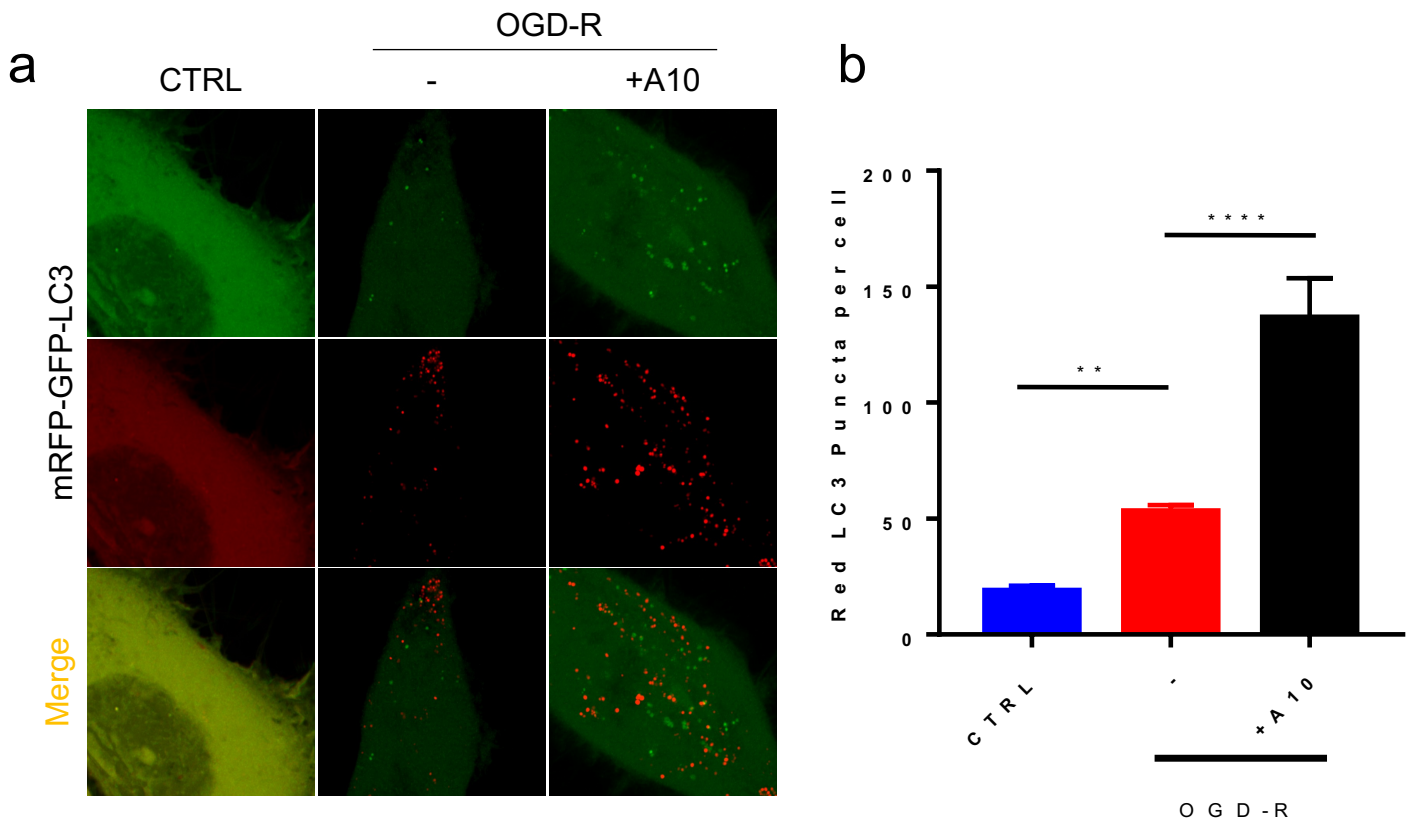

**Figure S2.** A10, a specific antagonist for TRPM2, accelerates autophagic flux under OGD-R treatment. (a) SH-SY5Y cells overexpressing mRFP-GFP-LC3 were treated with OGD for 6 h followed by 6 h of reperfusion. 30  $\mu$  M A10 was added during reperfusion. (b) The mean number of red LC3 puncta per cell in each condition were quantified. All data are from 3 independent experiments. Error bars: SEM. One-way ANOVA with post-hoc Tukey test. \*\* indicates  $p < 0.01$ , \*\*\*\* indicates  $p < 0.0001$ .
